# Supplementary material for: Reduced Shedding of Surface Mesothelin Improves Efficacy of Mesothelin-Targeting Recombinant Immunotoxins
Source: Oxford University Press journal article supplement (doi:10.1158/1535-7163.mct-15-0863), 2016-05-19
Supplement: 15357163mct150863-sup-157307_2_supp_3476555_86m5h9.docx [file 15357163mct150863-sup-157307_2_supp_3476555_86m5h9.docx]

**Reduced Shedding of Surface Mesothelin Improves Efficacy of Mesothelin Targeting Recombinant Immunotoxins**

Prince Awuah1, Tapan K. Bera1, Messan Folivi1,3, Oleg Chertov2, and Ira Pastan1

1Laboratory of Molecular Biology, Center for Cancer Research, National Cancer Institute, National Institutes of Health, Bethesda, MD; 2Cancer Research Technology Program, Leidos Biomedical, Inc., Frederick, MD

3Current address:Meharry Medical College, School of Medicine, Nashville, TN

**SUPPLEMENTARY FIGURE**

**
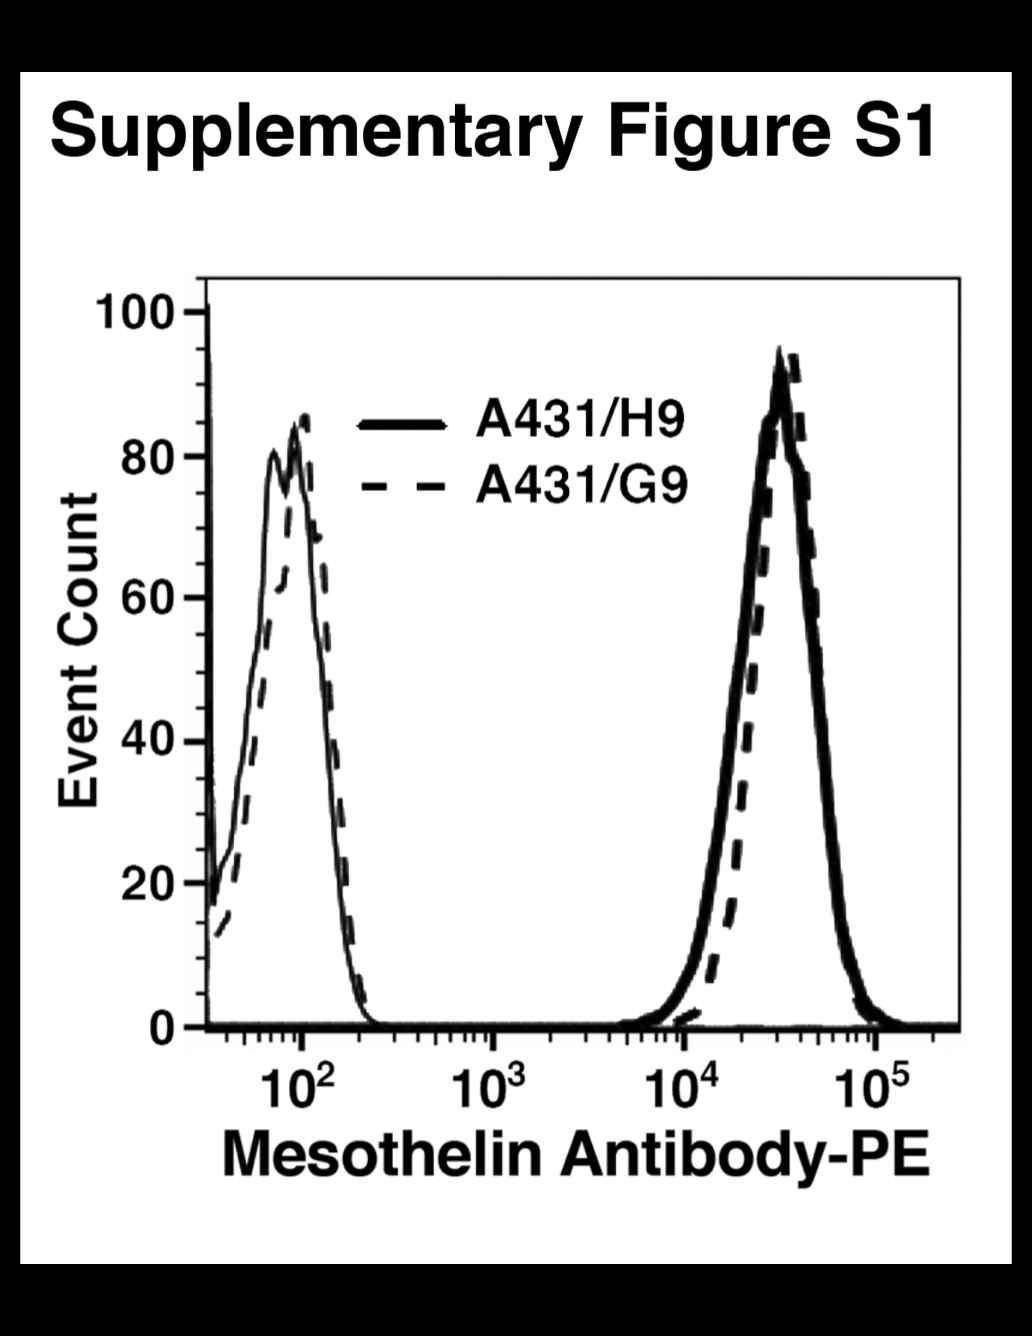
**

Flow cytometry analysis using 5 μg/ml of MSLN

antibody showing that wild-type and TACE mutant

cells express similar levels of surface MSLN. Cells

were plated on day 1 and the following day cells

were trypsinized, washed, and processed for flow

cytometry analysis.
